# Supplementary material for: Graphene-wrapped hierarchical TiO2 nanoflower composites with enhanced photocatalytic performance
Source: Royal Society of Chemistry journal article supplement (doi:10.1039/c3ta12329d), 2013-01-01
Supplement: c3ta12329d.pdf [file c3ta12329d.pdf]

## Electronic Supplementary Information (ESI)

# Graphene-Wrapped Hierarchical TiO<sub>2</sub> Nanoflower Composite with Enhanced Photocatalytic Performance

Gregory Lui,<sup>1</sup> Jin-Yun Liao,<sup>1</sup> Aoshu Duan,<sup>2</sup> Zisheng Zhang,<sup>2</sup> Michael Fowler<sup>1</sup> and Aiping Yu<sup>1\*</sup>

<sup>1</sup>Department of Chemical Engineering, University of Waterloo, Canada;

<sup>2</sup>Department of Chemical Engineering, University of Ottawa, Canada

Corresponding author: Aiping Yu, [aipingyu@uwaterloo.ca](mailto:aipingyu@uwaterloo.ca)

### *Characterization of materials using FTIR*

FTIR was performed to investigate the functionality and interaction between TiO<sub>2</sub> and RGO. RGO shows peaks at 1718 cm<sup>-1</sup> (C=O), 1577 cm<sup>-1</sup> (skeletal vibration), 1399 cm<sup>-1</sup> (C-OH), and 1246 cm<sup>-1</sup> (C-O-C) (J. Mater. Chem. C, 2013, 1, 3104-3109). The TiO<sub>2</sub> materials share a common broad peak at ~3400 cm<sup>-1</sup> (-OH) associated with the adsorption of water. The TiO<sub>2</sub> nanoflower also has a second peak at 1629 cm<sup>-1</sup>, which is assigned to the binding vibration of the H-O bond (J Nanopart Res (2008) 10:729–736). The 0.05G-TiO<sub>2</sub> composite also shares this peak at 1617 cm<sup>-1</sup>, however it is red shifted due to the presence of the skeletal vibration of RGO. The composite also has two small additional peaks at 1265 cm<sup>-1</sup> and 1061 cm<sup>-1</sup>, which can be assigned to the C-O-C and C-O stretching vibration of RGO. Therefore, although other groups have reported Ti-O-C peaks at 1738, 1260, 1096, and 798 cm<sup>-1</sup> (Angew. Chem. Int. Ed., 2003, 42, 4908-4911, Turk. J. Chem. 2005, 29, 487) which are also seen in our results, based on our data it is difficult to confirm the presence of this interaction due to their strong similarity to vibrational modes of RGO.

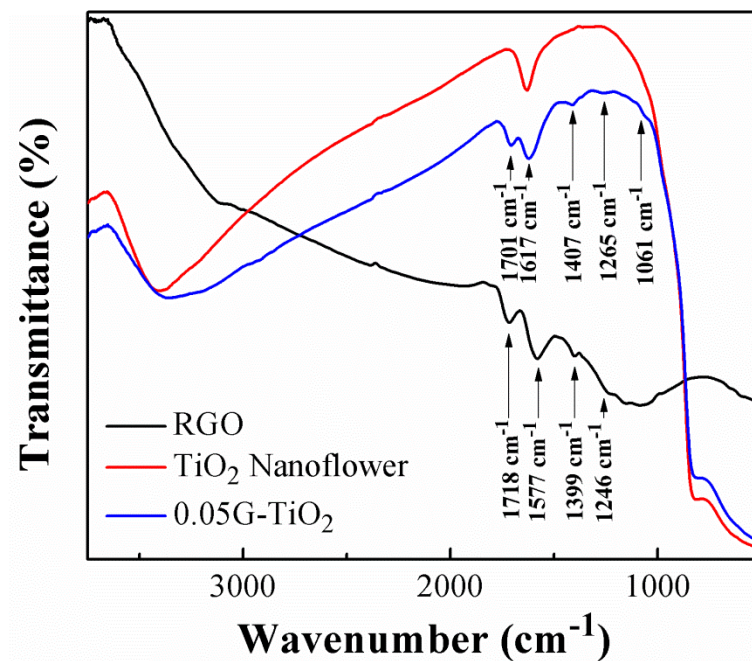

**Fig. S1** FTIR spectra of RGO, TiO<sub>2</sub> Nanoflower, and 0.05G-TiO<sub>2</sub>.
